# Supplementary material for: Transport variability of the Brazil Current from observations and a data assimilation model
Source: Copernicus journal article supplement (doi:10.5194/os-14-417-2018), 2018-06-07
Supplement: Supplementary file [file os-14-417-2018-supplement-title-page.pdf › os-14-417-2018-supplement-title-page.pdf]

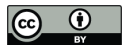

## *Supplement of*

# **Transport variability of the Brazil Current from observations and a data assimilation model**

**Claudia Schmid and Sudip Majumder**

*Correspondence to:* Claudia Schmid ([claudia.schmid@noaa.gov](mailto:claudia.schmid@noaa.gov))

- [os-14-417-2018-supplement-title-page.pdf](#)
- [Fig\\_S1.eps](#)
- [Fig\\_S2.eps](#)
  - [fig\\_S2.eps](#)

The copyright of individual parts of the supplement might differ from the CC BY 4.0 License.
